# Supplementary material for: An AIE active luminogen derived using 2-hydroxy-1-naphthaldehyde and 3-hydroxy-2-naphthohydrazide for the detection of sparfloxacin and azithromycin
Source: Royal Society of Chemistry journal article supplement (doi:10.1039/d4ay01706d), 2024-11-29
Supplement: d4ay01706d1.pdf [file d4ay01706d1.pdf]

## Supporting Information

### **AIE active luminogen derived using 2-hydroxy-1-naphthaldehyde and 3-hydroxy-2-naphthohydrazide for the detection of sparfloxacin and azithromycin**

**Dhvani A. Patel<sup>a</sup>, Bigyan R. Jali<sup>b</sup> and Suban K. Sahoo<sup>a\*</sup>**

*<sup>a</sup> Department of Chemistry, Sardar Vallabhbhai National Institute of Technology, Surat-395007, Gujarat, India.*

*<sup>b</sup> Department of Chemistry, Veer Surendra Sai University of Technology, Burla, Sambalpur-768018, Odisha, India.*

\*Corresponding author (Dr. Sahoo): [sks@chem.svnit.ac.in](mailto:sks@chem.svnit.ac.in).

## Sample Information

|                |                     |                    |                                                          |
|----------------|---------------------|--------------------|----------------------------------------------------------|
| Name           | AS_Barkha_310724_HN | Data File Path     | D:\Projects\SEP_2023\Data\Jul_2024\AS_Barkha_310724_HN.d |
| Sample ID      |                     | Acq. Time (Local)  | 31-07-2024 12:58:48 (UTC+05:30)                          |
| Instrument     | LCQTOF              | Method Path (Acq)  | D:\Projects\SEP_2023\Methods\POSITIVE.m                  |
| MS Type        | QTOF                | Version (Acq SW)   | 6200 series TOF/6500 series Q-TOF (11.0.203.0)           |
| Inj. Vol. (ul) | 2                   | IRM Status         | Success                                                  |
| Position       | P1-A2               | Method Path (DA)   | D:\Projects\INSTALLATION\Methods\IIT Roorkee.m           |
| Plate Pos.     |                     | Target Source Path |                                                          |
| Operator       | SYSTEM (SYSTEM)     | Result Summary     | 1 qualified (1 targets)                                  |

## Sample Spectra

## + Scan (rt: 0.146 min)

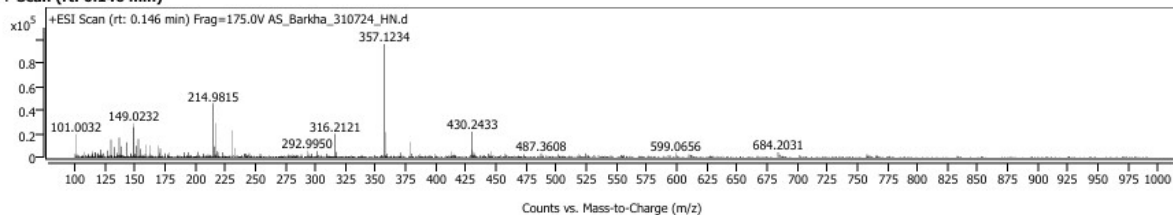

## Compound Details

## Cpd. 1: C22 H16 N2 O3

| Formula       | Mass     | Score | Algorithm | Diff (Tgt, ppm)    | Polarity |
|---------------|----------|-------|-----------|--------------------|----------|
| C22 H16 N2 O3 | 356.1161 | 99.66 | FBF       | 0.0350825925363825 | Positive |

## Compound Spectra (overlaid)

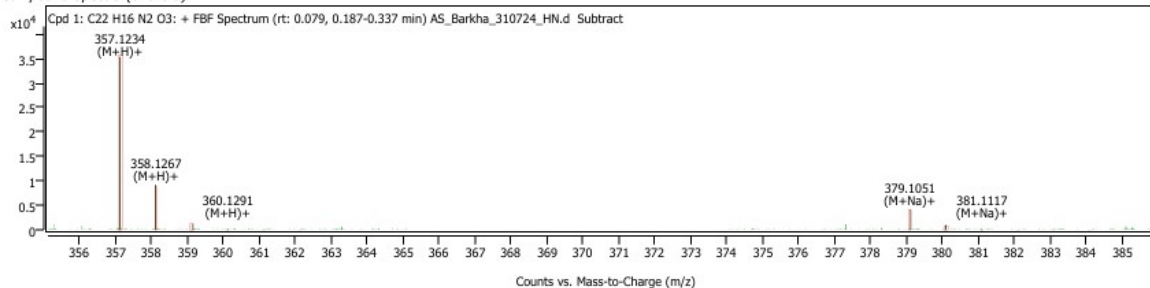

MassHunter Qual 10.0  
(End of Report)

Fig. S1. Mass spectrum of NANH.

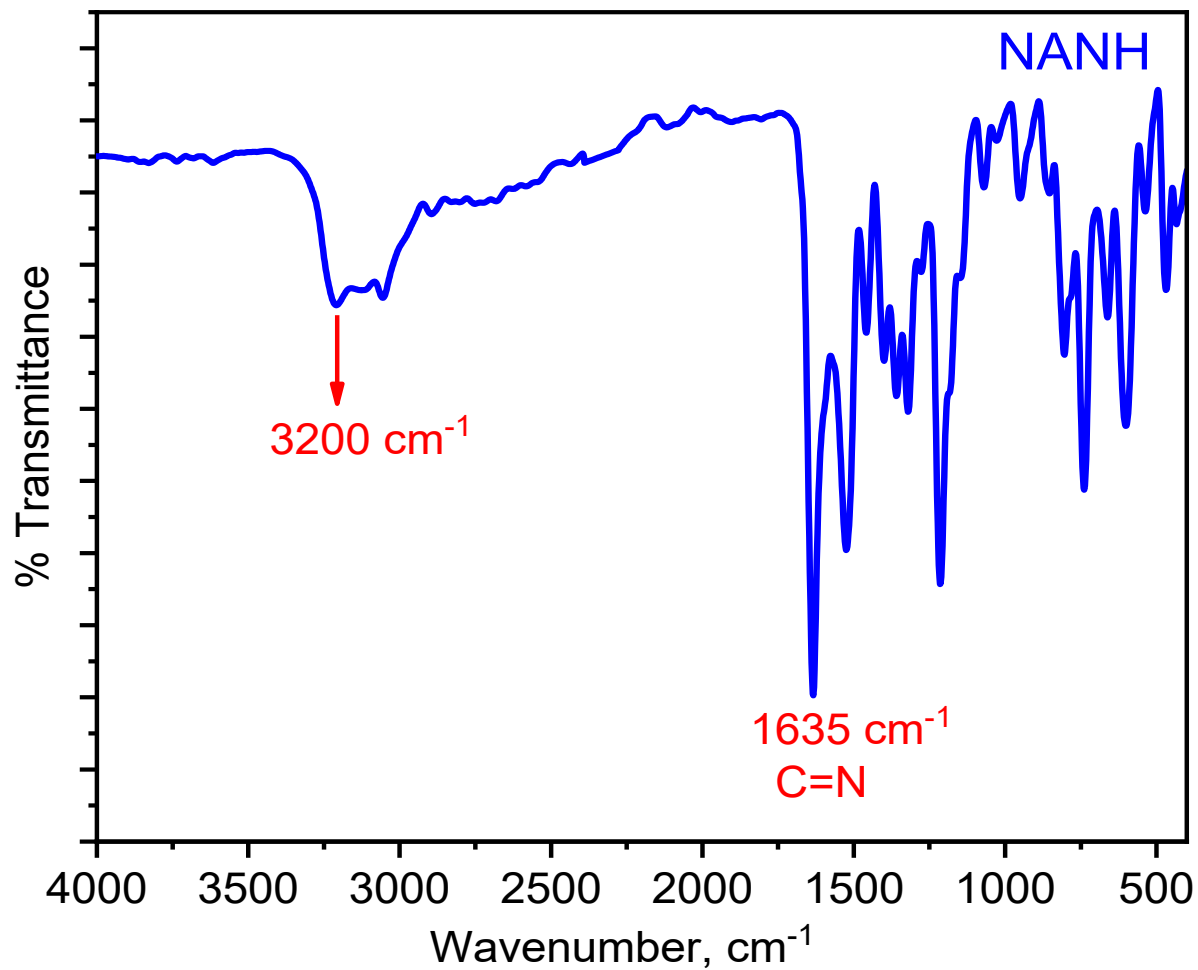

**Fig. S2.** FTIR spectrum of NANH.

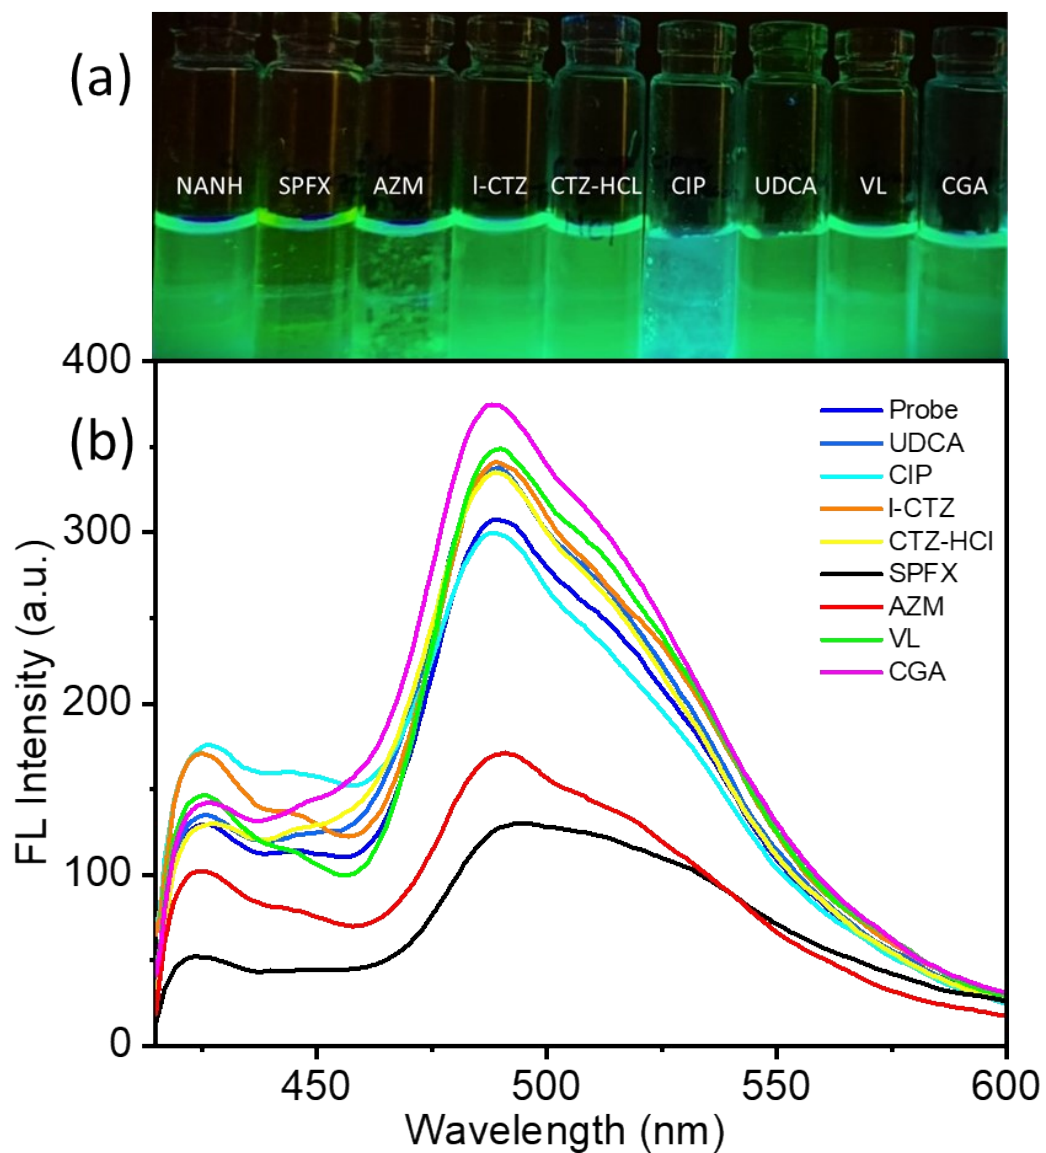

**Fig. S3.** (a) The detectable color changes under UV light (365 nm) and (b) fluorescence spectral changes of NANH (50  $\mu\text{M}$ ,  $f_{\text{HEPES}}$  95%, pH 7.4) in the absence and presence of various analytes (50  $\mu\text{M}$ ).

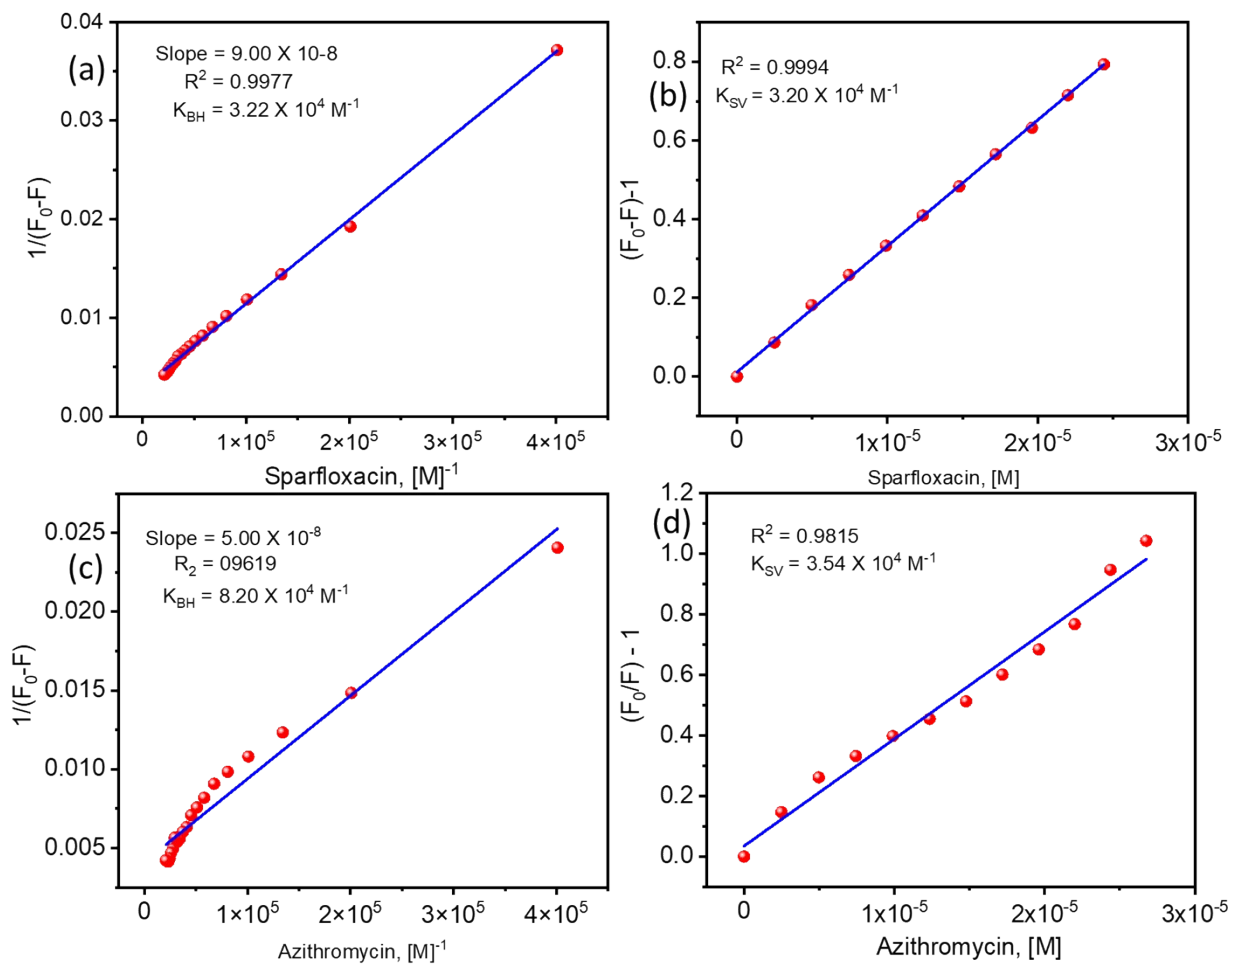

**Fig. S4.** The BH plot of AIEgen NANH with detected analytes (a) sparfloxacin and (c) azithromycin. The Stern Volmer plot of AIEgen NANH with detected analytes (b) sparfloxacin and (d) azithromycin.

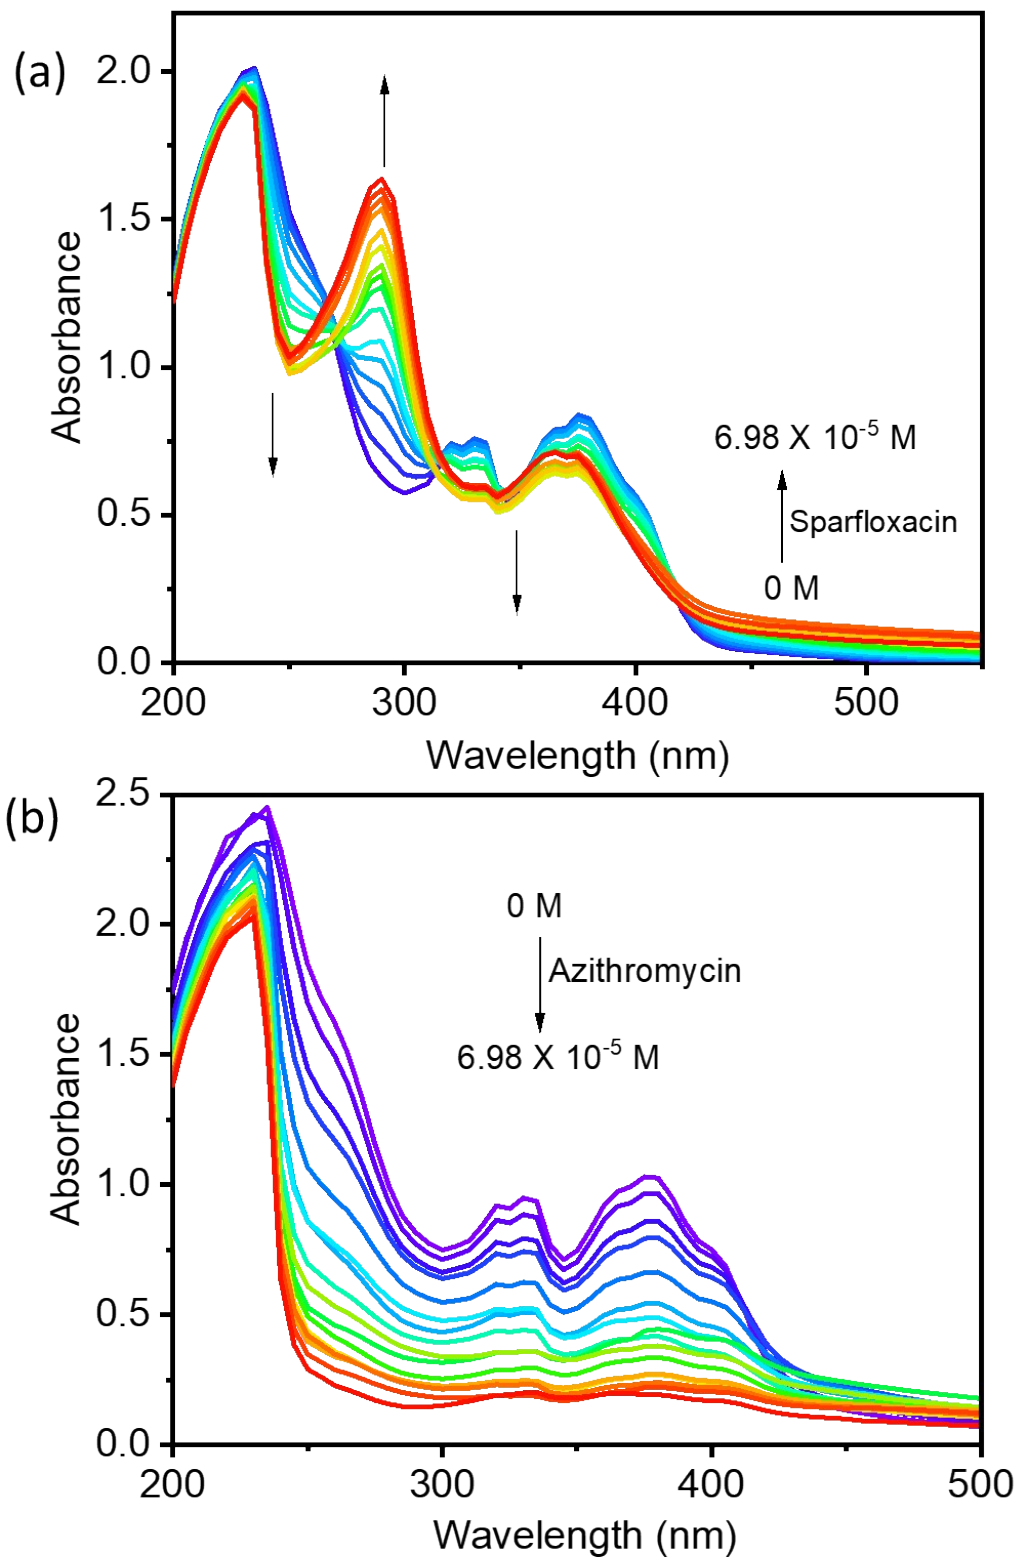

**Fig. S5.** The UV-Vis absorption spectral changes of NANH ( $50 \mu\text{M}$ ,  $f_{\text{HEPES}}$  95%) upon gradual incremental addition of (a) sparfloxacin and (b) azithromycin.

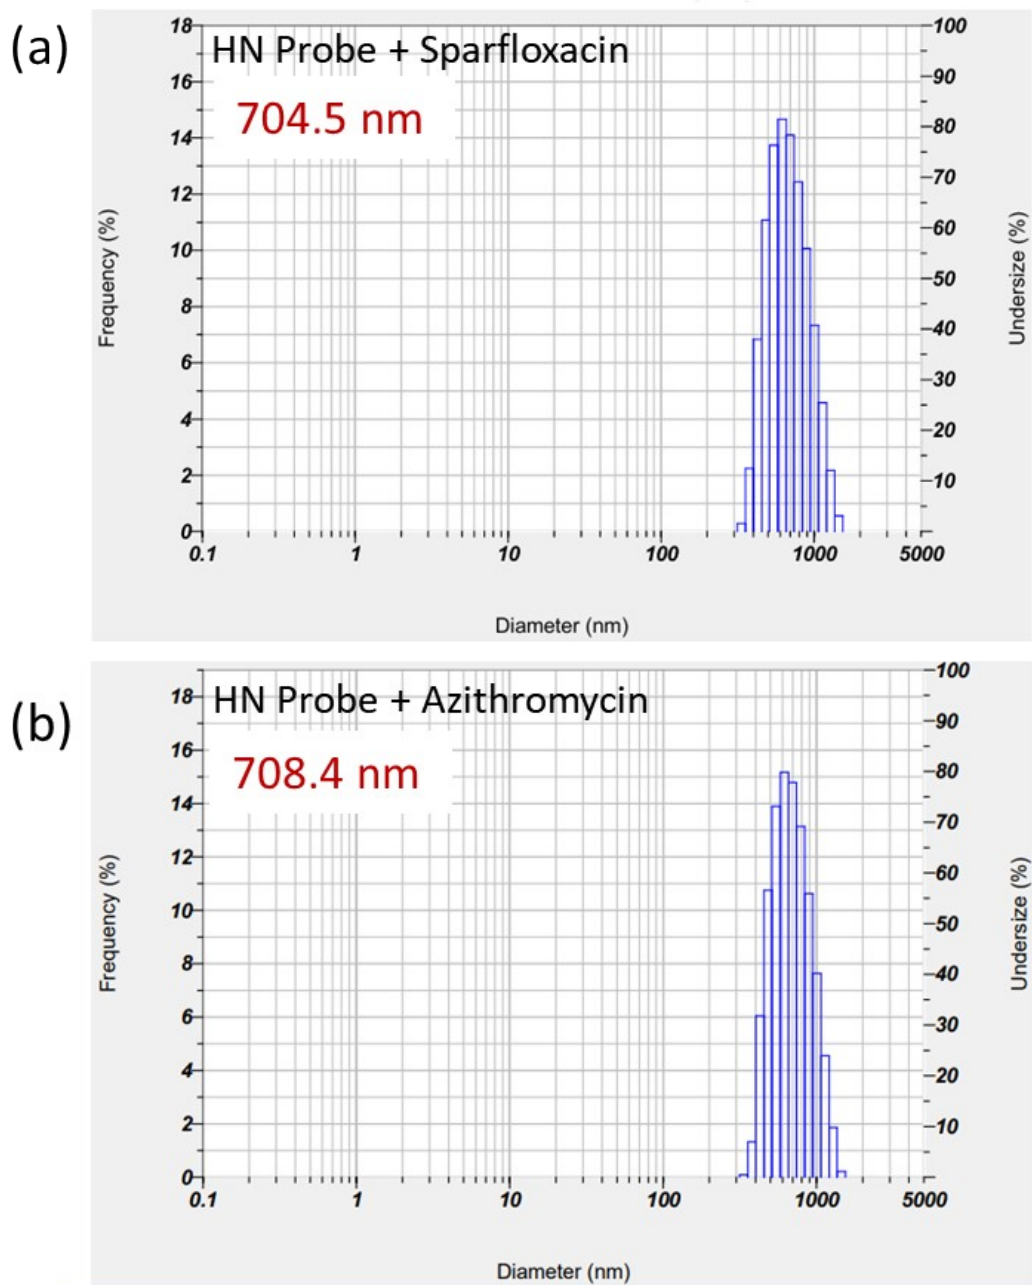

**Fig. S6.** DLS profile of AIEgen NANH ( $50 \mu\text{M}$ ,  $f_{\text{HEPES}}$  95%) after adding sparfloxacin and azithromycin ( $50 \mu\text{M}$ ).

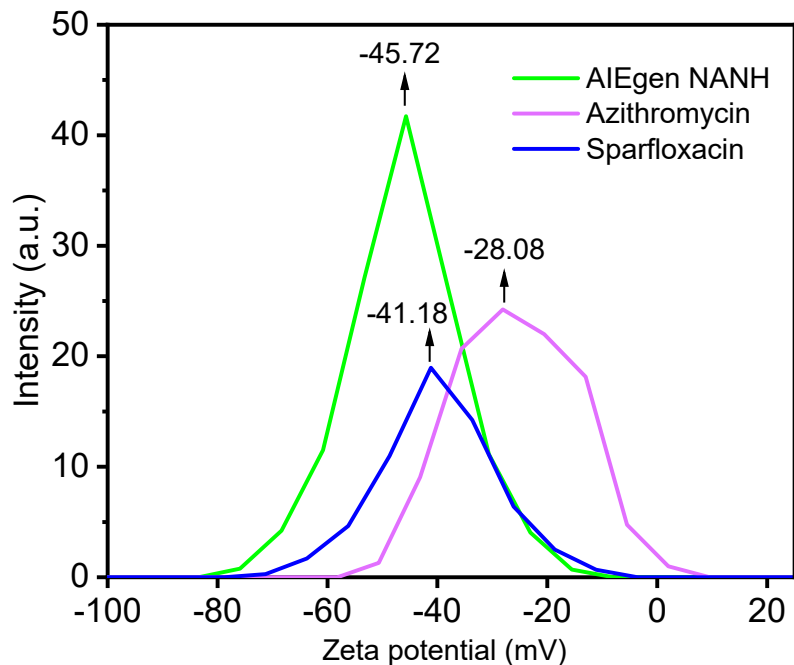

**Fig. S7.** Zeta potential values of AIEgen NANH in the absence and presence of azithromycin and sparfloxacin.

**Table S1.** Real sample analysis of sparfloxacin in blood serum.

| <b>Sparfloxacin</b>   |                       |                   |              |
|-----------------------|-----------------------|-------------------|--------------|
| <b>Added, M</b>       | <b>Found, M</b>       | <b>Recovery %</b> | <b>± RSD</b> |
| $1.96 \times 10^{-5}$ | $1.88 \times 10^{-5}$ | 95.91 %           | 0.68         |
| $2.20 \times 10^{-5}$ | $2.12 \times 10^{-5}$ | 96.36 %           | 1.06         |
| $2.43 \times 10^{-5}$ | $2.40 \times 10^{-5}$ | 98.76 %           | 0.96         |

**Table S2.** Real sample analysis of azithromycin in blood serum.

| <b>Azithromycin</b>   |                       |                   |              |
|-----------------------|-----------------------|-------------------|--------------|
| <b>Added, M</b>       | <b>Found, M</b>       | <b>Recovery %</b> | <b>± RSD</b> |
| $1.23 \times 10^{-5}$ | $1.18 \times 10^{-5}$ | 95.93 %           | 1.35         |
| $1.47 \times 10^{-5}$ | $1.45 \times 10^{-5}$ | 98.63 %           | 2.04         |
| $1.71 \times 10^{-5}$ | $1.70 \times 10^{-5}$ | 99.41 %           | 0.77         |

\*\*\*\*\*
